# Supplementary material for: Using landscape history to predict biodiversity patterns in fragmented landscapes
Source: PubMed Central journal article supplement (PMC4231225; doi:10.1111/ele.12160), 2013-08-11

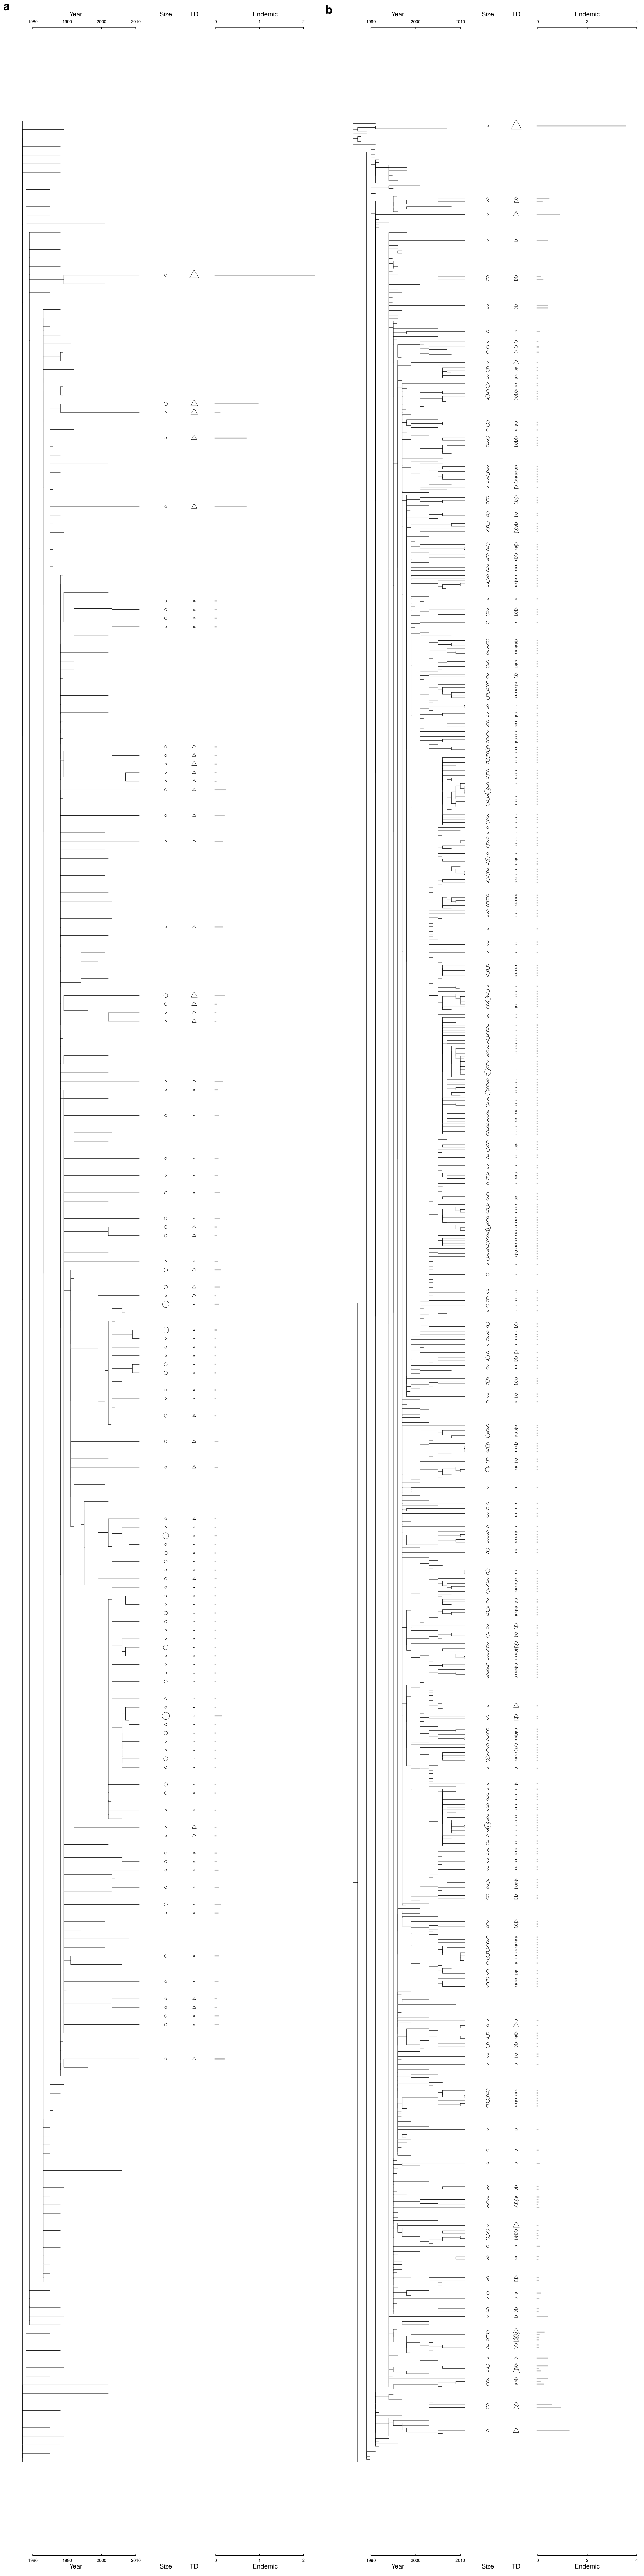

Supplement: ele0016-1221-sd1.pdf [file ele0016-1221-sd1.pdf]
